# Supplementary material for: Decoupling salinity and carbonate chemistry: low calcium ion concentration rather than salinity limits calcification in Baltic Sea mussels
Source: Copernicus journal article supplement (doi:10.5194/bg-18-2573-2021), 2021-04-22
Supplement: Supplementary file 1 [file bg-18-2573-2021-supplement.pdf]

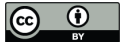

*Supplement of*

**Decoupling salinity and carbonate chemistry: low calcium ion concentration rather than salinity limits calcification in Baltic Sea mussels**

**Trystan Sanders et al.**

*Correspondence to:* Trystan Sanders (t.b.sanders@soton.ac.uk)

The copyright of individual parts of the supplement might differ from the article licence.

## Datasets

### Dataset #1

#### Product name

BALTIC SEA PHYSICS ANALYSIS AND FORECAST

#### Product identifier

BALTICSEA\_ANALYSIS\_FORECAST\_PHY\_003\_006

#### Link

[https://resources.marine.copernicus.eu/?option=com\\_csw&task=results?option=com\\_csw&view=details&product\\_id=BALTICSEA\\_ANALYSIS\\_FORECAST\\_PHY\\_003\\_006](https://resources.marine.copernicus.eu/?option=com_csw&task=results?option=com_csw&view=details&product_id=BALTICSEA_ANALYSIS_FORECAST_PHY_003_006) last accessed 29/08/2017

#### Short description

This Baltic Sea physical model product provides forecasts for the physical conditions in the Baltic Sea. The Baltic forecast is updated twice daily providing a new six days forecast with hourly data for sea level variations, ice concentration and thickness at the surface, and temperature, salinity and horizontal velocities for the 3D field. The product is produced by the 3D ocean model code HBM developed within the Baltic ocean community. The product grid has a resolution of 1 nautical mile in the horizontal, and up to 25 vertical depth levels. The area covers the Baltic Sea including the transition area towards the North Sea (i.e. the Danish Belts, the Kattegat and Skagerrak).

#### Spatial resolution

2 km x 2 km

#### Vertical coverage

From -400 to 0 (25 levels)

#### Temporal resolution

Hourly – instantaneous, daily – mean, monthly - mean

#### Update frequency

2 x daily

#### Production unit

BAL-DMI-COPENHAGEN-DK; BAL-BSH-HAMBURG-GE

## Supplementary Tables

**Table S1: Constituent chemicals added to solution to make calcium free artificial seawater (CFASW) after Kester, 1967. Mass of each chemical added was adjusted for the**

| Salt                            | Molecular weight | g/L at respective salinity |         |        |        |
|---------------------------------|------------------|----------------------------|---------|--------|--------|
|                                 |                  | 35                         | 16      | 11     | 6      |
| NaCl                            | 58.44            | 23.9260                    | 10.9376 | 7.5196 | 4.1016 |
| Na <sub>2</sub> SO <sub>4</sub> | 142.04           | 4.0080                     | 1.8322  | 1.2597 | 0.6871 |
| MgCl <sub>2</sub>               | 95.21            | 2.37                       | 1.0834  | 0.7449 | 0.4063 |
| KCl                             | 74.56            | 0.6770                     | 0.3095  | 0.2128 | 0.1161 |
| NaHCO <sub>3</sub>              | 84.00            | 0.1960                     | 0.0896  | 0.0616 | 0.0336 |
| KBr                             | 119.01           | 0.0980                     | 0.0448  | 0.0308 | 0.0168 |
| H <sub>3</sub> BO <sub>3</sub>  | 61.83            | 0.0260                     | 0.0119  | 0.0082 | 0.0045 |
| SrCl <sub>2</sub>               | 158.51           | 0.0085                     | 0.0039  | 0.0027 | 0.0015 |
| NaF                             | 41.99            | 0.0030                     | 0.0014  | 0.0009 | 0.0005 |

**experimental salinities in this study (16, 11 and 6). All stock solutions also contained 5 % filtered seawater from the collections site to ensure presence of trace elements.**

**Table S2: Mean experimental biomass densities and food availability over the duration of both experiments. Metrics presented include: aquarium volumes, mean animal no. per tank, mean mortality rates (no mortality was observed in the calcium experiment), ml of seawater per animal, body dry mass (BM) per animal, total BM per tank, BM L<sup>-1</sup> seawater, mean no. of feeds day<sup>-1</sup>, final phytoplankton concentration in experimental vessels after feeding, total no. of phytoplankton cells day<sup>-1</sup> and the no. of cells mg<sup>-1</sup> BM day<sup>-1</sup>. Mean values are presented across treatments (n = 4 replicates) over the duration of both experiments. The two most important metrics, BM litre<sup>-1</sup> and no. of phytoplankton cells mg<sup>-1</sup> BM day<sup>-1</sup> were not identical, but within the same order of magnitude for both experiments. For comparison, inter-treatment range values are given below experimental means within the bicarbonate ion manipulation experiment, illustrating BM litre<sup>-1</sup> and phytoplankton cell no. mg<sup>-1</sup> BM day<sup>-1</sup> varied by a larger degree within the bicarbonate experiment than between both experiments, further supporting comparability between both experiments.**

| Experiment                      | Aquarium volume (ml) | no. animals per tank | mortality rate end of exp. | ml per animal    | BM per animal (mg)       | total BM per tank (mg)    | BM per litre (mg l <sup>-1</sup> ) | no. of feeds per day | Phytoplankton cell conc. in tanks (cells ml <sup>-1</sup> ) | total no. of cells per day | no. of cells mg <sup>-1</sup> BM day <sup>-1</sup>                              |
|---------------------------------|----------------------|----------------------|----------------------------|------------------|--------------------------|---------------------------|------------------------------------|----------------------|-------------------------------------------------------------|----------------------------|---------------------------------------------------------------------------------|
| <b>Calcium manipulation</b>     | 50                   | 2                    | N/A                        | 25.0             | 0.329                    | 0.658                     | <b>13.2</b>                        | 1.0                  | 10 000                                                      | 5 x 10 <sup>5</sup>        | <b>7.6 x 10<sup>5</sup></b>                                                     |
| <b>Bicarbonate manipulation</b> | 2000                 | 752<br>(1440 - 400)  | 53 %<br>(10 - 75 %)        | 1.3<br>(1.4 - 5) | 0.064<br>(0.163 - 0.746) | 48.128<br>(65.2 - 1074.2) | <b>24.06</b><br>(32.6 - 537.1)     | 2.5                  | 10 000                                                      | 5 x 10 <sup>7</sup>        | <b>4.9 x 10<sup>5</sup></b><br>(4.7 x 10 <sup>4</sup> - 7.7 x 10 <sup>5</sup> ) |

**Table S3: List of all R packages used for data analysis complete with versions, years, authors and intended use.**

| <i>Package</i> | <i>Complete name</i>                      | <i>Version</i> | <i>Year</i> | <i>Author</i>                                               | <i>Use</i>                       |
|----------------|-------------------------------------------|----------------|-------------|-------------------------------------------------------------|----------------------------------|
| fitdistrplus   | Fit distribution                          | 1.0-14         | 2019        | Marie Laure Delignette-Muller, Christophe Dutang (2015)     | Fitting data distributions       |
| ggplot2        | Elegant graphics for data analysis        | 3.3.0          | 2016        | Wickham H (2016)                                            | Graphics                         |
| nlme           | Linear and non-linear mixed effect models | 3.1-147        | 2020        | Pinheiro J, Bates D, Debroy S, Sarkar D, R Core Team (2020) | Fit and compare models           |
| drc            | Dose response analysis                    | 3.0-1          | 2016        | Ritz, C., Baty, F., Streibig, J. C., Gerhard, D. (2015)     | Analysis of dose-response curves |
| ncdf4          | Interface to Unidata netCDF files         | 1.17           | 2019        | David Pierce (2010)                                         | Read data from netCDF files      |
| cmocean        | cmocean                                   | 0.2            | 2019        | Thyng, K., Richards, C. and Krylov, I.,                     | Colour maps for oceanography     |

**Table S4: Model parameters for the power relationship between shell length and CaCO<sub>3</sub> mass with statistical results; standard error, *T* value and *p* value (Fig. S3). These separate relationships were used to calculate calcification rates in the field from shell length measurements for each population.**

| Parameter        | Site       | value | Std. Error | <i>T</i> -value | <i>p</i> -value |
|------------------|------------|-------|------------|-----------------|-----------------|
| <i>intercept</i> | Usedom     | 0.171 | 0.032      | 5.36            | < <b>0.001</b>  |
|                  | Ahrenshoop | 0.050 | 0.012      | 4.29            | < <b>0.001</b>  |
| <i>power</i>     | Kiel       | 0.036 | 0.004      | 8.17            | < <b>0.001</b>  |
|                  | Usedom     | 2.163 | 0.092      | 23.64           | < <b>0.001</b>  |
|                  | Ahrenshoop | 2.716 | 0.107      | 25.43           | < <b>0.001</b>  |
|                  | Kiel       | 3.000 | 0.046      | 65.24           | < <b>0.001</b>  |

**Table S5: Model comparisons using AIC for selection of the most parsimonious negative exponential decay model fit to laboratory calcification rates across experimental [HCO<sub>3</sub><sup>-</sup>] in the bicarbonate ion manipulation experiment. Model names and equations are shown with fixed parameters allowing direct comparison between salinity treatments. The lowest AIC value (in bold) represents the model which best explains the experimental data and was chosen for statistical analysis.**

| <i>Model</i>         | <i>Equation</i>                                   | <i>Fixed parameters</i> | <i>Estimated parameters</i> | <i>AIC</i>    |
|----------------------|---------------------------------------------------|-------------------------|-----------------------------|---------------|
| Von Bertalanffy      | $y \sim C_{\max} * (1 - e^{-K * (x - s_0)})$      | $s_0 = 380$             | $C_{\max}, K$               | <b>115.58</b> |
| Gompertz             | $y \sim C_{\max} * (1 + s_0 * (e^{-K * x}))^{-1}$ | $s_0 = 380$             | $C_{\max}, K$               | 116.49        |
| Logistic             | $y \sim C_{\max} * (1 + s_0 * (e^{-K * x}))^{-1}$ | $s_0 = 380$             | $C_{\max}, K$               | 115.79        |
| Negative exponential | $y \sim C_{\max} * (1 - e^{-x/K})$                |                         | $C_{\max}, K$               | 121.82        |
| Michaelis-Menten     | $y \sim C_{\max} * x / (K + x)$                   |                         | $C_{\max}, K$               | 122.21        |

**Table S6: Statistical test results of all analyses graphically depicted in Figs 2 - 7. Pairwise comparisons (*post-hoc* tests) between treatments for statistically significant factors are listed on the right with significant *P*-values being shown in bold.**

| ANCOVA – laboratory calcification rates [Ca <sup>2+</sup> ] manipulation experiment (Fig. 5b)         |                 |                   |                 |                |                |                              |                |
|-------------------------------------------------------------------------------------------------------|-----------------|-------------------|-----------------|----------------|----------------|------------------------------|----------------|
| <i>factor</i>                                                                                         | <i>df</i>       | <i>Sum Sq.</i>    | <i>Mean Sq.</i> | <i>F-value</i> | <i>P-value</i> | <i>pair-wise comparisons</i> | <i>P-value</i> |
| Calcium                                                                                               | 1               | 7160              | 7160            | 106.9          | < <b>0.001</b> | 11-16                        | 0.988          |
| Salinity                                                                                              | 2               | 110.9             | 55.5            | 0.83           | 0.442          | 6-16                         | 0.559          |
| Calcium:Salinity                                                                                      | 2               | 452.4             | 226.2           | 3.38           | <b>0.041</b>   | 6-11                         | 0.47           |
| Residuals                                                                                             | 54              | 3616              | 67              |                |                |                              |                |
| Negative exponential decay model – Laboratory calcification and $\Omega_{\text{aragonite}}$ (Fig. 6a) |                 |                   |                 |                |                |                              |                |
| <i>parameter</i>                                                                                      | <i>estimate</i> | <i>Std. Error</i> | <i>T-value</i>  | <i>P-value</i> |                |                              |                |
| $C_{\text{max}}$                                                                                      | 31.2315         | 5.244             | 5.956           | < <b>0.001</b> |                |                              |                |
| K                                                                                                     | 0.374           | 0.1598            | 2.341           | <b>0.027</b>   |                |                              |                |
| Negative exponential decay model – Laboratory calcification and ESIR (Fig. 6b)                        |                 |                   |                 |                |                |                              |                |
| <i>parameter</i>                                                                                      | <i>estimate</i> | <i>Std. Error</i> | <i>T-value</i>  | <i>P-value</i> |                |                              |                |
| $C_{\text{max}}$                                                                                      | 33.7696         | 5.9676            | 5.659           | < <b>0.001</b> |                |                              |                |
| K                                                                                                     | 0.2752          | 0.1117            | 2.463           | <b>0.020</b>   |                |                              |                |
| ANCOVA – Field calcification rates (Fig. 7)                                                           |                 |                   |                 |                |                |                              |                |
| <i>factor</i>                                                                                         | <i>df</i>       | <i>Sum Sq.</i>    | <i>Mean Sq.</i> | <i>F-value</i> | <i>P-value</i> | <i>pair-wise comparisons</i> | <i>P-value</i> |
| time                                                                                                  | 1               | 952304            | 952304          | 517.7          | < <b>0.001</b> | Kie:Ahp                      | < <b>0.001</b> |
| population                                                                                            | 2               | 2096837           | 1048419         | 570.0          | < <b>0.001</b> | Use:Ahp                      | 0.99           |
| time:population                                                                                       | 2               | 1769631           | 884815          | 491.0          | < <b>0.001</b> | Use:Kie                      | < <b>0.001</b> |
| Residuals                                                                                             | 12              | 30873             | 2573            |                |                |                              |                |
| ANOVA – Mean salinity at field monitoring sites (Fig. 2)                                              |                 |                   |                 |                |                |                              |                |
| <i>factor</i>                                                                                         | <i>df</i>       | <i>Sum Sq.</i>    | <i>Mean Sq.</i> | <i>F-value</i> | <i>P-value</i> | <i>pair-wise comparisons</i> | <i>P-value</i> |
| site                                                                                                  | 2               | 1248              | 624.2           | 38518          | < <b>0.001</b> | Ahp-Kie                      | < <b>0.001</b> |
| residuals                                                                                             | 17253           | 279.6             | 0.02            |                |                | Ahp-Use                      | < <b>0.001</b> |
|                                                                                                       |                 |                   |                 |                |                | Kie-Use                      | < <b>0.001</b> |
| ANOVA – Mean [HCO <sub>3</sub> <sup>-</sup> ] at field monitoring sites (Fig. 3c)                     |                 |                   |                 |                |                |                              |                |
| <i>factor</i>                                                                                         | <i>df</i>       | <i>Sum Sq.</i>    | <i>Mean Sq.</i> | <i>F-value</i> | <i>P-value</i> | <i>pair-wise comparisons</i> | <i>P-value</i> |



|                                                                                 |           |                |                 |                |                |                              |                         |
|---------------------------------------------------------------------------------|-----------|----------------|-----------------|----------------|----------------|------------------------------|-------------------------|
| site                                                                            | 2         | 414716         | 207358          | 38.80          | < <b>0.001</b> | Ahp-Kie                      | < <b>0.001</b>          |
| residuals                                                                       | 55        | 293930         | 5344            |                |                | Ahp-Use<br>Kie-Use           | 0.722<br>< <b>0.001</b> |
| ANOVA – Mean pH at field monitoring sites (Fig. 3a)                             |           |                |                 |                |                |                              |                         |
| <i>factor</i>                                                                   | <i>df</i> | <i>Sum Sq.</i> | <i>Mean Sq.</i> | <i>F-value</i> | <i>P-value</i> |                              |                         |
| site                                                                            | 2         | 0.092          | 0.046           | 1.217          | 0.304          |                              |                         |
| residuals                                                                       | 55        | 2.070          | 0.038           |                |                |                              |                         |
| ANOVA – Salinity- $A_T$ relationship across all field monitoring sites (Fig. 4) |           |                |                 |                |                |                              |                         |
| <i>factor</i>                                                                   | <i>df</i> | <i>Sum Sq.</i> | <i>Mean Sq.</i> | <i>F-value</i> | <i>P-value</i> |                              |                         |
| salinity                                                                        | 1         | 571206         | 571206          | 86.6           | < <b>0.001</b> |                              |                         |
| residuals                                                                       | 56        | 369521         | 6599            |                |                |                              |                         |
| ANOVA – Mean $\Omega_{\text{aragonite}}$ at field monitoring sites (Fig. 3e)    |           |                |                 |                |                |                              |                         |
| <i>factor</i>                                                                   | <i>df</i> | <i>Sum Sq.</i> | <i>Mean Sq.</i> | <i>F-value</i> | <i>P-value</i> | <i>pair-wise comparisons</i> | <i>P-value</i>          |
| site                                                                            | 2         | 1.89           | 0.94            | 7.22           | <b>0.002</b>   | Ahp-Kie                      | <b>0.044</b>            |
| residuals                                                                       | 55        | 7.18           | 0.13            |                |                | Ahp-Use<br>Kie-Use           | <b>0.002</b><br>0.654   |
| ANOVA – Mean ESIR at field monitoring sites (Fig. 3g)                           |           |                |                 |                |                |                              |                         |
| <i>factor</i>                                                                   | <i>df</i> | <i>Sum Sq.</i> | <i>Mean Sq.</i> | <i>F-value</i> | <i>P-value</i> | <i>pair-wise comparisons</i> | <i>P-value</i>          |
| site                                                                            | 2         | 3.98           | 1.99            | 10.88          | < <b>0.001</b> | Ahp-Kie                      | <b>0.020</b>            |
| residuals                                                                       | 55        | 10.07          | 0.18            |                |                | Ahp-Use<br>Kie-Use           | 0.363<br>< <b>0.001</b> |
| ANOVA - Mean Chl- <i>a</i> values at field monitoring sites (Fig. 3i)           |           |                |                 |                |                |                              |                         |
| <i>factor</i>                                                                   | <i>df</i> | <i>Sum Sq.</i> | <i>Mean Sq.</i> | <i>F-value</i> | <i>P-value</i> | <i>pair-wise comparisons</i> | <i>P-value</i>          |
| site                                                                            | 2         | 11.41          | 5.7             | 13.8           | < <b>0.001</b> | Ahp-Kie                      | < <b>0.001</b>          |
| residuals                                                                       | 77        | 31.82          | 0.41            |                |                | Ahp-Use<br>Kie-Use           | < <b>0.001</b><br>0.35  |

**Table S7: Model parameters and  $R^2$  values for the linear relationships: Salinity- $A_T$  and  $\Omega_{\text{aragonite}}$ -ESIR. Also shown are the parameter estimates and residual sum of squares (RSS) for the negative exponential decay model fit to laboratory calcification rates in both experiments and substrate inhibitor ratio (SIR) not including  $[\text{Ca}^{2+}]$ .**

| <b>Linear model – Salinity-<math>A_T</math> (Fig. 4)</b>                                       |                 |                   |                |                |                      |
|------------------------------------------------------------------------------------------------|-----------------|-------------------|----------------|----------------|----------------------|
| <i>factor</i>                                                                                  | <i>estimate</i> | <i>Std. Error</i> | <i>T-value</i> | <i>P-value</i> | <i>R<sup>2</sup></i> |
| intercept                                                                                      | 1679.9          | 32.4              | 51.9           | <0.001         | 0.6                  |
| slope                                                                                          | 22.13           | 2.4               | 9.3            | <0.001         |                      |
| <b>Linear model – Field <math>\Omega_{\text{aragonite}}</math>-ESIR relationship (Fig. S8)</b> |                 |                   |                |                |                      |
| <i>factor</i>                                                                                  | <i>estimate</i> | <i>Std. Error</i> | <i>T-value</i> | <i>P-value</i> | <i>R<sup>2</sup></i> |
| intercept                                                                                      | 0.337           | 0.049             | 6.89           | <0.001         | 0.805                |
| slope                                                                                          | 0.781           | 0.051             | 15.39          | <0.001         |                      |
| <b>Negative exponential decay model – Laboratory calcification and SIR (Fig. S5)</b>           |                 |                   |                |                |                      |
| <i>parameter</i>                                                                               | <i>estimate</i> | <i>Std. Error</i> | <i>T-value</i> | <i>P-value</i> | <i>RSS</i>           |
| $C_{\text{max}}$                                                                               | 22.66           | 2.75              | 8.23           | <0.001         | 4631                 |
| $K$                                                                                            | 0.02            | 0.01              | 1.45           | 0.157          |                      |

**Table S8: Parameters for the linear model fit to  $[Ca^{2+}]$  and calcification rates in the calcium ion manipulation experiment and the negative exponential decay model fit to  $[HCO_3^-]$  and calcification rates in the bicarbonate manipulation experiment. Significant *p*-values are shown in bold and graphical representations of these models are depicted in Fig. 5.**

| <b>Linear model parameters – <math>[Ca^{2+}]</math>-calcification</b>                     |                  |              |                   |                |                |
|-------------------------------------------------------------------------------------------|------------------|--------------|-------------------|----------------|----------------|
| <i>salinity</i>                                                                           | <i>treatment</i> | <i>value</i> | <i>Std. Error</i> | <i>T-value</i> | <i>P-value</i> |
| 6                                                                                         | intercept        | 7.21         | 3.84              | 1.88           | 0.065          |
| 11                                                                                        |                  | 2.42         | 5.44              | -0.88          | 0.382          |
| 16                                                                                        |                  | -2.69        | 2.33              | 1.66           | 0.102          |
| 6                                                                                         | slope            | 1.67         | 1.67              | 3.9            | < <b>0.001</b> |
| 11                                                                                        |                  | 5.56         | 2.33              | -1.78          | 0.081          |
| 16                                                                                        |                  | 2.37         | 2.37              | 2.57           | <b>0.013</b>   |
| <b>Negative exponential decay model parameters - <math>[HCO_3^-]</math>-calcification</b> |                  |              |                   |                |                |
| <i>salinity</i>                                                                           | <i>treatment</i> | <i>value</i> | <i>Std. Error</i> | <i>T-value</i> | <i>P-value</i> |
| 6                                                                                         | $C_{max}$        | 4.68         | 2.03              | 2.31           | < <b>0.001</b> |
| 11                                                                                        |                  | 34.00        | 2.07              | 16.39          | < <b>0.001</b> |
| 16                                                                                        |                  | 35.25        | 1.78              | 19.79          | < <b>0.001</b> |
| 6                                                                                         | $K$              | 0.007        | 0.008             | 0.843          | < <b>0.001</b> |
| 11                                                                                        |                  | 0.007        | 0.001             | 5.966          | < <b>0.001</b> |
| 16                                                                                        |                  | 0.011        | 0.002             | 6.106          | < <b>0.001</b> |

**Table S9: Parameters for negative exponential decay models fit to calcification rates ( $\mu\text{g CaCO}_3 \text{ d}^{-1}$ ) and  $[\text{Ca}^{2+}]$  and  $[\text{HCO}_3^-]$  predictors across both laboratory experiments. Parameters with significant estimates have *P*-values in bold.**

| <b>Negative exponential model – <math>[\text{Ca}^{2+}]</math> – calcification (Fig. S4b)</b> |              |                   |                |                   |
|----------------------------------------------------------------------------------------------|--------------|-------------------|----------------|-------------------|
| <i>parameter</i>                                                                             | <i>value</i> | <i>Std. Error</i> | <i>T-value</i> | <i>P-value</i>    |
| $C_{\text{max}}$                                                                             | 47.29        | 30.18             | 1.57           | 0.128             |
| $K$                                                                                          | 5.10         | 4.89              | 1.04           | 0.306             |
| <b>Negative exponential model – <math>[\text{HCO}_3^-]</math> – calcification (Fig. S4a)</b> |              |                   |                |                   |
| <i>parameter</i>                                                                             | <i>value</i> | <i>Std. Error</i> | <i>T-value</i> | <i>P-value</i>    |
| $C_{\text{max}}$                                                                             | 25.00        | 6.49              | 3.85           | <b>&lt; 0.001</b> |
| $K$                                                                                          | 740.38       | 618.65            | 1.20           | 0.241             |

**Table S10: Parameters and statistical results for the linear model fit to field calcification over time during the first 7 months. The linear slopes of these models express the calcification rates for each of the 3 populations (Table 1).**

| Linear model - Field calcification rates over first 7 months. |                  |              |                   |                |                |
|---------------------------------------------------------------|------------------|--------------|-------------------|----------------|----------------|
| <i>salinity</i>                                               | <i>parameter</i> | <i>value</i> | <i>Std. Error</i> | <i>T-value</i> | <i>P-value</i> |
| Usedom                                                        | intercept        | -495.0       | 7657.9            | -0.07          | 0.953          |
| Ahrenshoop                                                    |                  | -457.5       | 7657.9            | -0.08          | 0.938          |
| Kiel                                                          |                  | -116675.0    | 5414.9            | -15.24         | < <b>0.001</b> |
| Usedom                                                        | slope            | 18.6         | 53.2              | -0.33          | 0.761          |
| Ahrenshoop                                                    |                  | 36.4         | 53.2              | 0.97           | 0.405          |
| Kiel                                                          |                  | 2202.9       | 37.6              | 40.70          | < <b>0.001</b> |

**Table S11: Statistical results for the Kruskal-Wallis test comparing temperatures (°C) at each site during the monitoring period.**

| Kruskal-Wallis test – Mean temperatures at field monitoring sites (Fig. S7) |           |                |                  |                |
|-----------------------------------------------------------------------------|-----------|----------------|------------------|----------------|
| <i>Kruskal-Wallis chi squared</i>                                           | <i>df</i> | <i>P-value</i> | <i>Dunn test</i> | <i>P-value</i> |
| 122.73                                                                      | 2         | <0.001         | Ahp-Kie          | < <b>0.001</b> |
|                                                                             |           |                | Ahp-Use          | <b>0.042</b>   |
|                                                                             |           |                | Kie-Use          | < <b>0.001</b> |

## Supplementary Figures

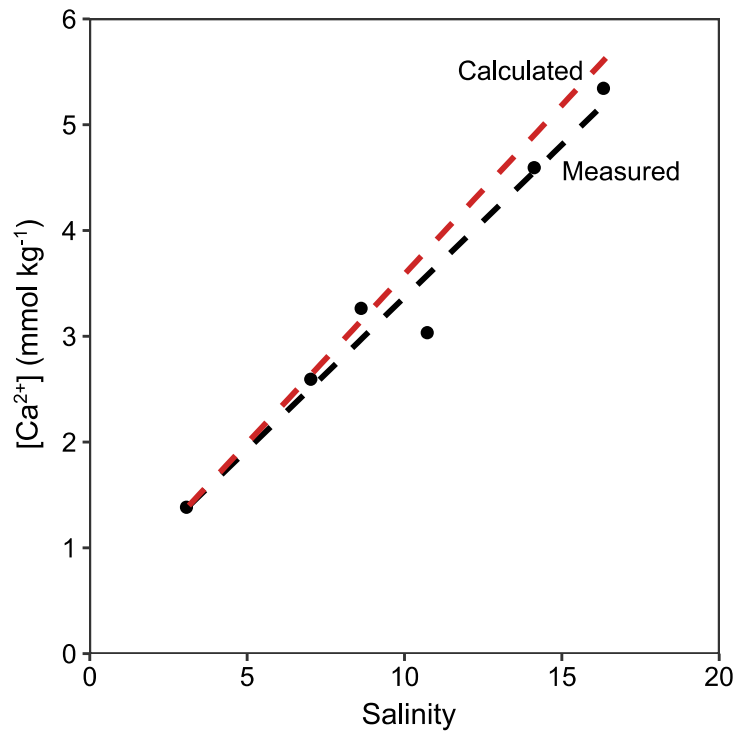

**Figure S1: Comparison of the linear relationship between salinity and [Ca<sup>2+</sup>] in the Southwest Baltic Sea from calculated [Ca<sup>2+</sup>] values (red dashed line) and measured [Ca<sup>2+</sup>] values (blue dashed line). Methodologies for calculated and measured [Ca<sup>2+</sup>] values are given in the text (Sections 2.1 and .5). Samples for the lowest salinity (3.15) were taken from the Achterwasser in Usedom (54° 0' 5" N, 14° 2' 47" E).**

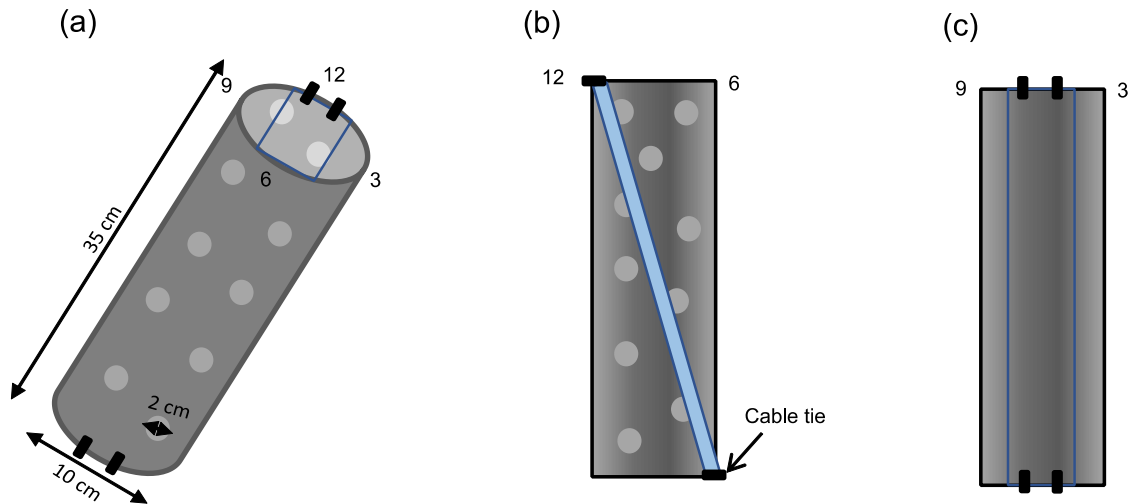

**Figure S2: Settlement structures deployed at all three sites (Kiel, Ahrenshoop and Usedom) in March 2016 (a). A cross section of the settlement structures from 12 o'clock to 6 o'clock showing the orientation of the mesh net inside the cylinder (b). Cross section of the settlement structures showing the width of the mesh net inside the cylinder (c). A total of twenty x 2 cm diameter holes were drilled into each cylinder and a 0.2 cm pore size cotton/nylon spat sock was diagonally positioned across the inside of the cylinders using cable ties. Numbers at the top of each figure represent the orientation of the cross sections in panels b and c.**



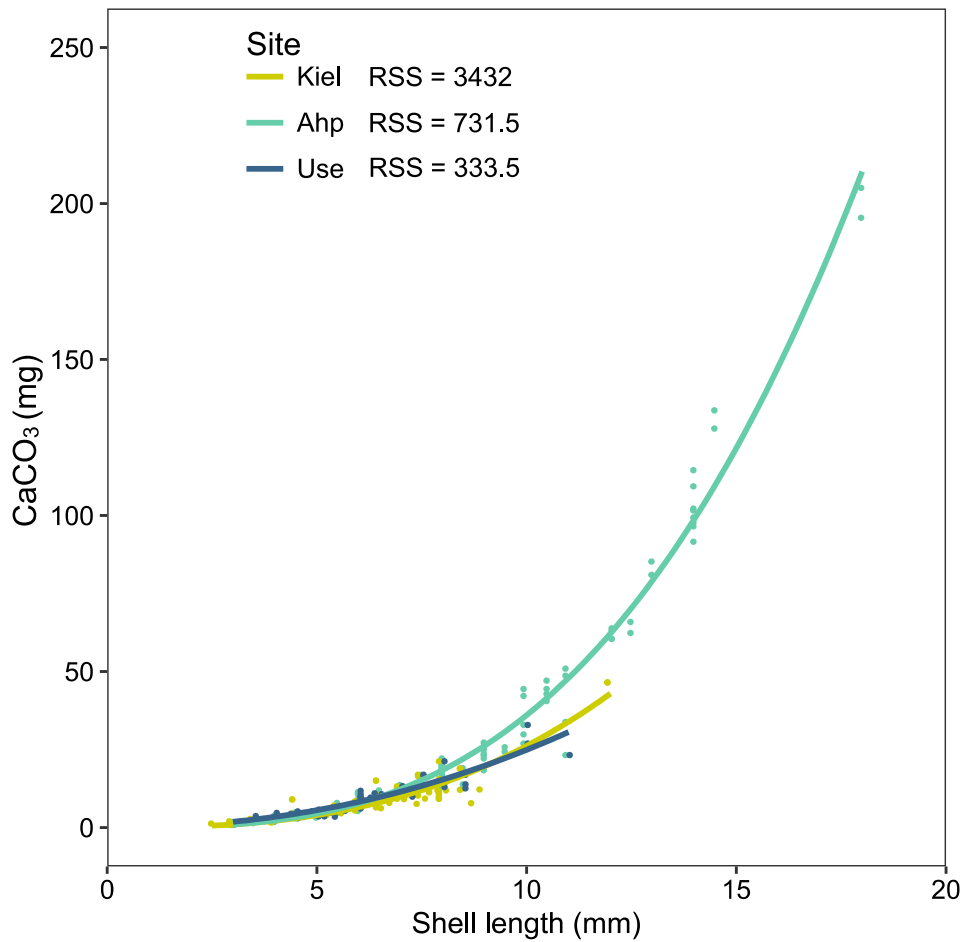

**Figure S3: SL-CaCO<sub>3</sub> mass (mg) relationships specific to each of the three study populations: Kiel, Ahrenshoop and Usedom (data from Sanders et al., 2018). This was used to calculate initial CaCO<sub>3</sub> mass in laboratory experiments and field calcification at the three monitoring sites in this study. Power model parameters are given in Table S4 with the insets listing the residual sum of squares (RSS) for each population.**

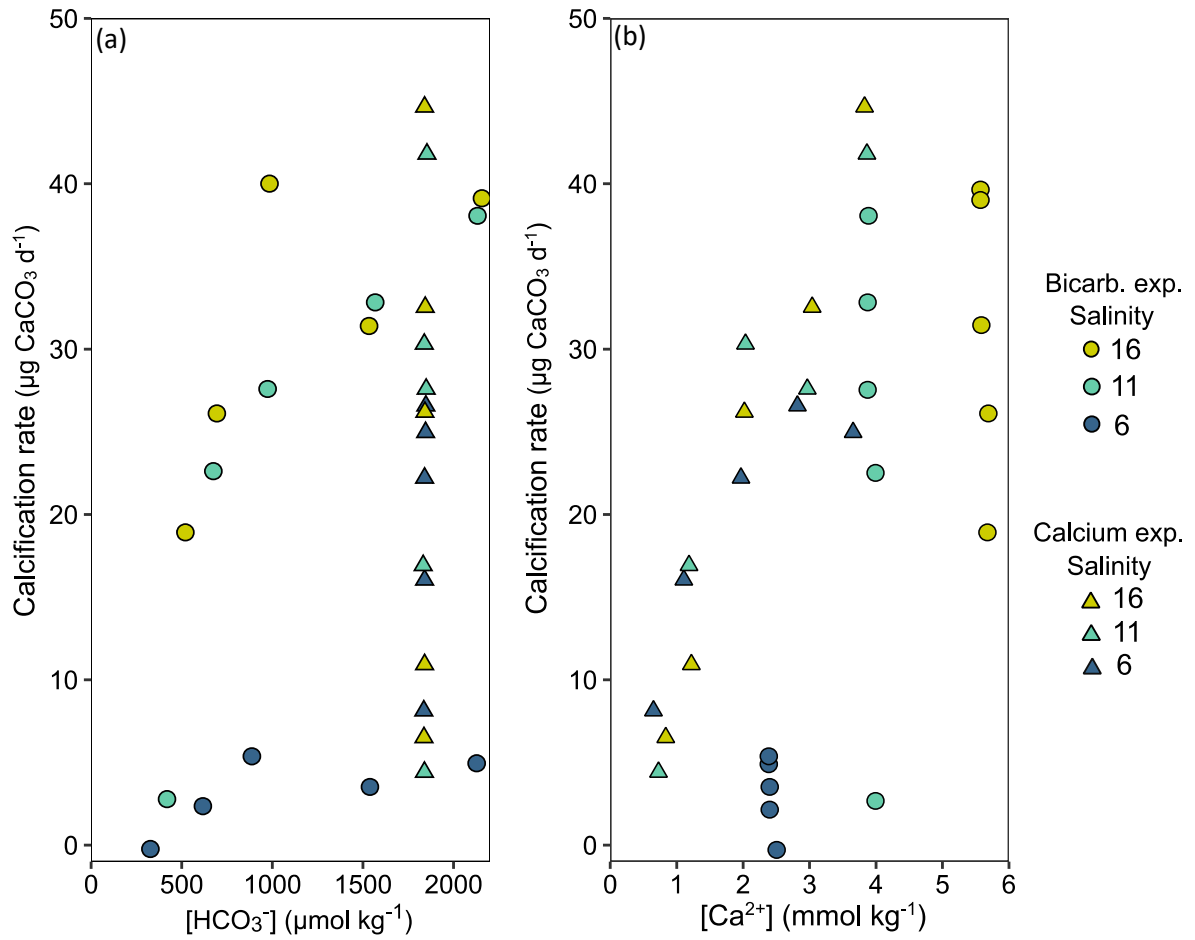

**Figure S4: Calcification rates at all salinities from both laboratory experiments plotted across all  $[\text{HCO}_3^-]$  (a) and all  $[\text{Ca}^{2+}]$  (b). No significant relationship was found for either variable.**

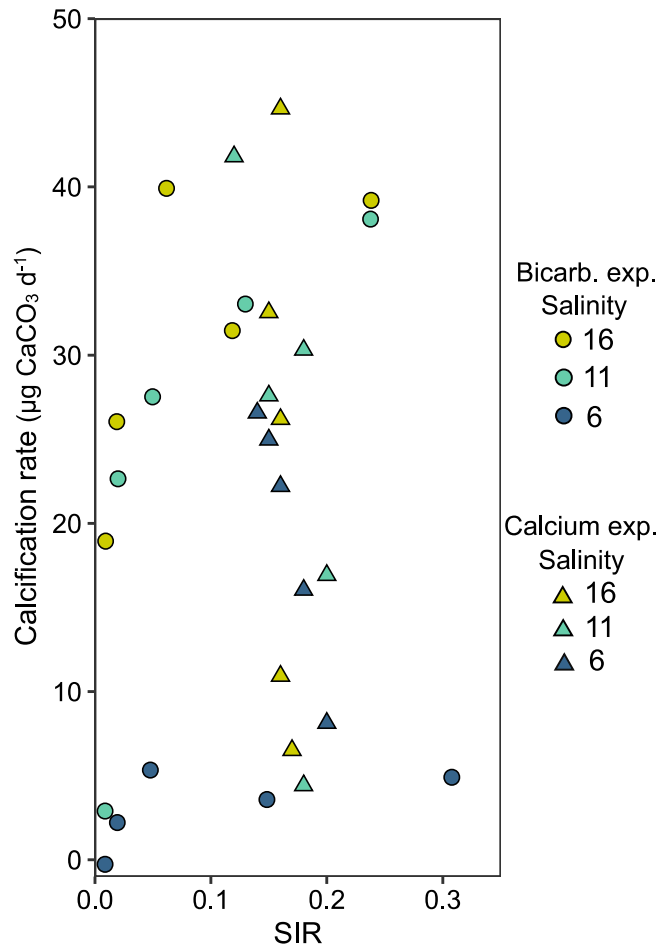

**Figure S5. Calcification rates at all salinities from both laboratory experiments plotted across substrate inhibitor ratio (SIR). This measure excludes the effect of  $[\text{Ca}^{2+}]$  and no statistically significant model could be fit (Table S7).**

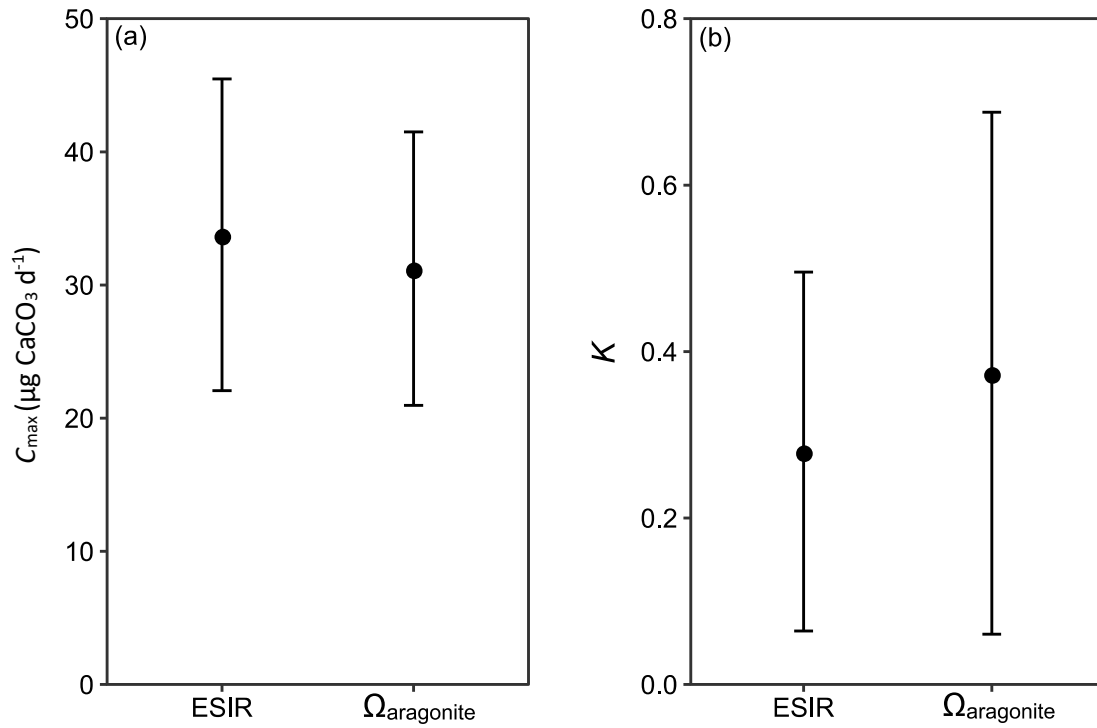

**Figure S6: Graphical comparisons of parameters  $C_{\text{max}}$  ( $\mu\text{g CaCO}_3 \text{ d}^{-1}$ ) and  $K$  in the negative exponential decay model depicted in Fig. 6. Values are shown  $\pm$  95 % confidence intervals (CI). Overlaps in the CI indicates the two parameters in both models are not significantly different.**

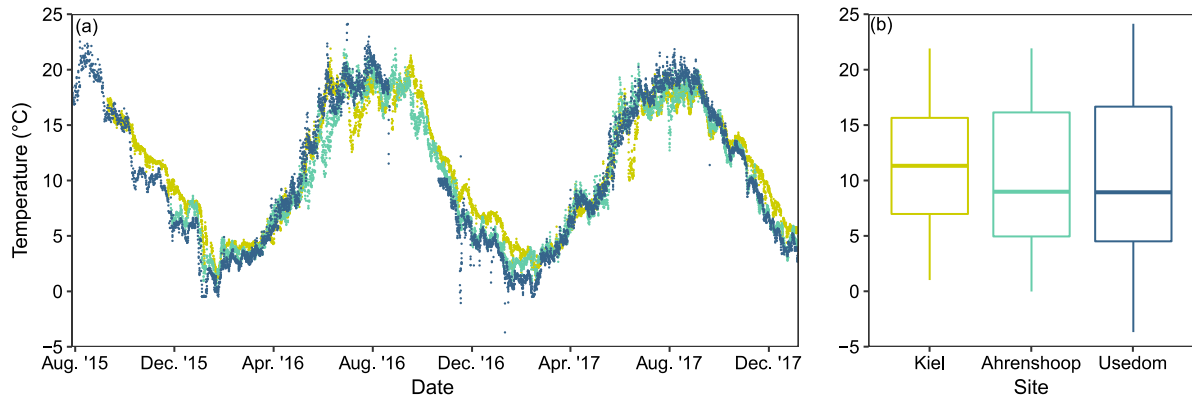

**Figure S7: Temperature (°C) data from deployed CTD's at the three monitoring sites from Aug. 2015 - Dec. 2017 (a). Box pots are shown on the right depicting median temperatures and interquartile ranges (b).**

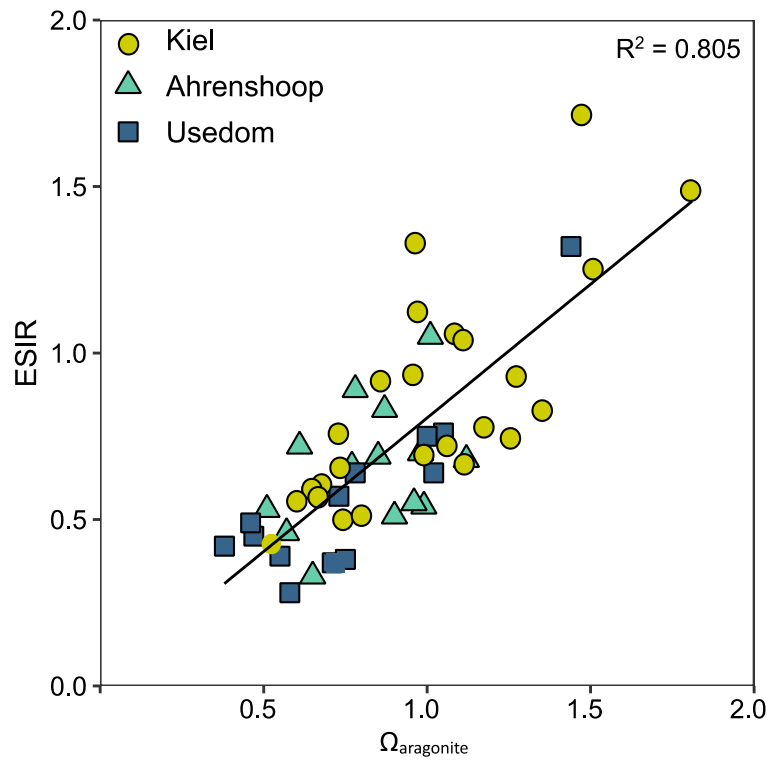

**Figure S8: Field extended substrate inhibitor ratio (ESIR) plotted against aragonite saturation state ( $\Omega_{\text{aragonite}}$ ) over the monitoring period at all three Baltic Sea sites. Parameters for the linear model are given in Table S7.**

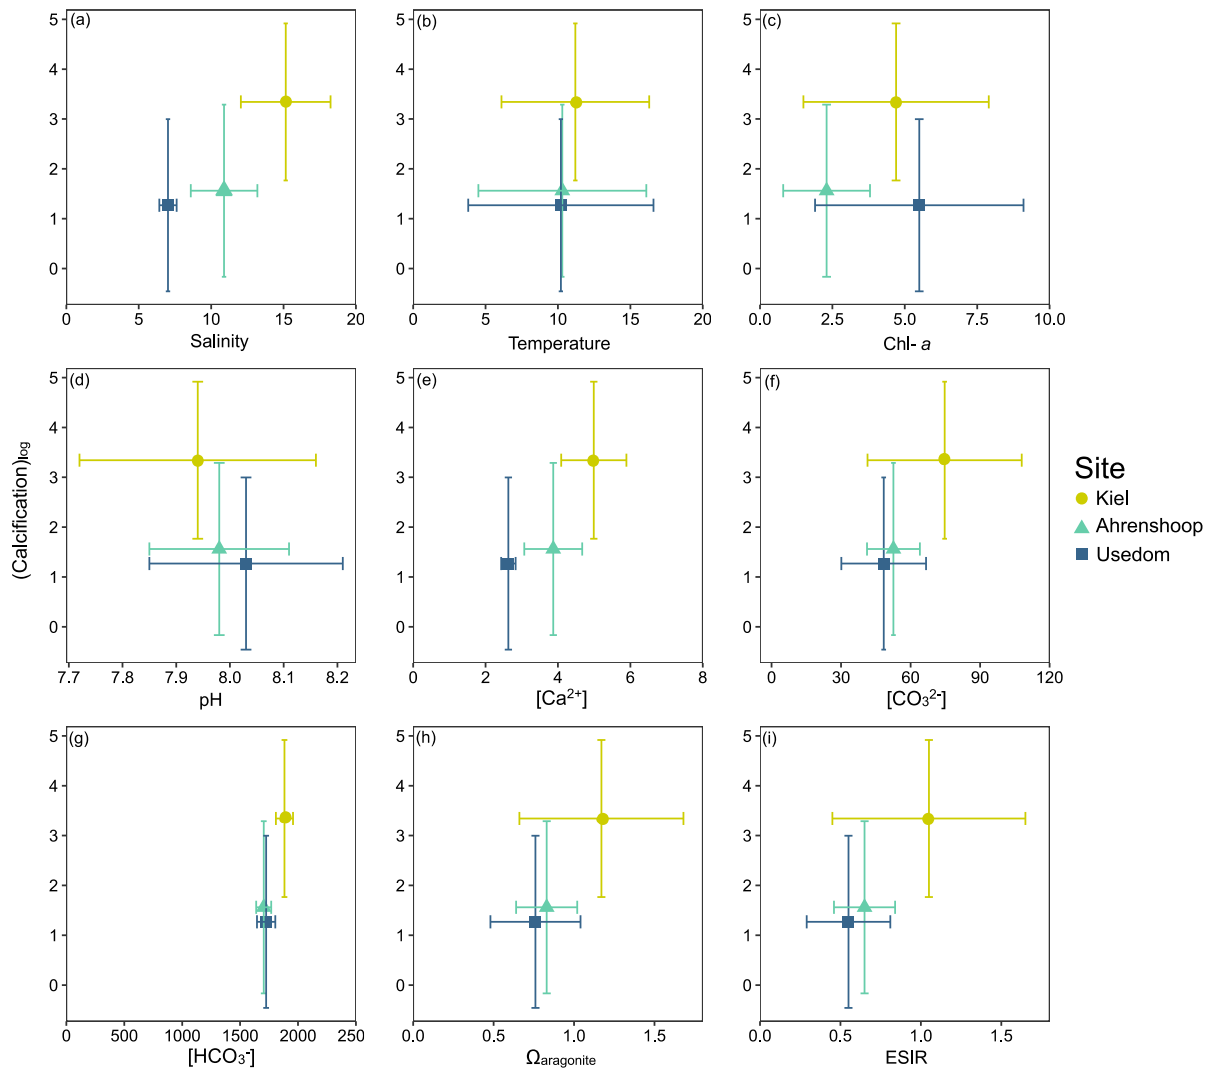

**Figure S9: Log transformed field calcification rates (y-axes) plotted against multiple environmental parameters; Salinity (a), Temperature (°C) (b), chl-*a* ( $\mu\text{g L}^{-1}$ ) (c),  $\text{pH}_{\text{total}}$  (d),  $[\text{Ca}^{2+}]$  ( $\text{mmol kg}^{-1}$ ) (e),  $[\text{CO}_3^{2-}]$  ( $\mu\text{mol kg}^{-1}$ ) (f),  $[\text{HCO}_3^-]$  ( $\mu\text{mol kg}^{-1}$ ) (g),  $\Omega_{\text{aragonite}}$  (h), ESIR ( $[\text{Ca}^{2+}][\text{HCO}_3^-] / [\text{H}^+]$ ) (i). Values are shown  $\pm$  standard deviation.**

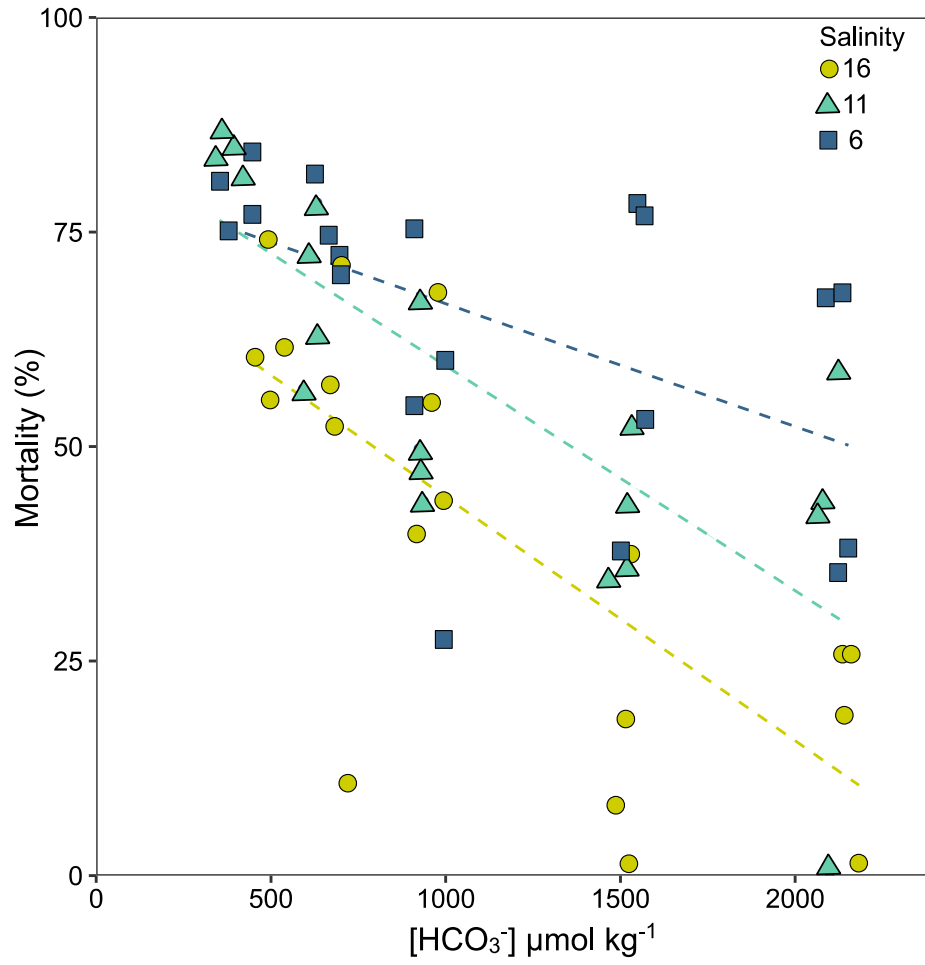

**Figure S10: Total mortality rate in each treatment (n = 4 replicates) at the end of the bicarbonate ion manipulation experiment from an initial number of 1600 animals per 2L aquaria.**



## References

Ritz, C., Baty, F., Streibig, J. C. and Gerhard, D.: Dose-Response Analysis Using R, PLOS ONE, 10, e0146021, 2015.

Delignette-Muller, M. L. and Dutang C.: fitdistrplus: An R Package for Fitting Distributions, J. Stat. Softw., 64, 1-34, 2015.

Wickham, H.: ggplot2: Elegant Graphics for Data Analysis. Springer-Verlag, New York, ISBN 978-3-319-24277-4, 2016.

Pinheiro, J., Bates, D., Debroy, S., Sarkar, D. and R Core Team.: nlme: Linear and Nonlinear Mixed Effects Models, R package version 3, 1-147, 2020.
